# Supplementary material
Source: PubMed Central journal article supplement (PMC3661761)
Supplement: NIHMS456295-supplement-1.pdf [file NIHMS456295-supplement-1.pdf]

## Supplementary Information

# **Structure of a class II preQ<sub>1</sub> riboswitch reveals ligand recognition by a new fold**

Joseph A. Liberman, Mohammad Salim, Jolanta Krucinska and Joseph E. Wedekind\*

*Dept. Biochemistry and Biophysics, Center for RNA Biology, University of Rochester School of  
Medicine and Dentistry, Rochester NY 14642, USA.*

\*e-mail: [joseph.wedekind@rochester.edu](mailto:joseph.wedekind@rochester.edu)

## Supplementary Results

**Supplementary Table 1 | PreQ<sub>1</sub>-II Riboswitch Ligand Affinity and Thermodynamic Parameters<sup>a</sup>**

|                                                              | kD         | n           | $\Delta H$             | $\Delta S$                             | $-T\Delta S$           | $\Delta G$             | $\Delta\Delta G^b$     |
|--------------------------------------------------------------|------------|-------------|------------------------|----------------------------------------|------------------------|------------------------|------------------------|
|                                                              | (nM)       |             | kcal mol <sup>-1</sup> | kcal K <sup>-1</sup> mol <sup>-1</sup> | kcal mol <sup>-1</sup> | kcal mol <sup>-1</sup> | kcal mol <sup>-1</sup> |
| wild type,<br>6 mM<br>MgCl <sub>2</sub>                      | 17.9 ± 0.6 | 1.00 ± 0.02 | -31.9 ± 0.1            | -73.4 ± 1.2                            | 21.5 ± 0.1             | -10.4 ± 0.1            | N/A                    |
| MC <sup>c</sup><br>6 mM<br>MgCl <sub>2</sub>                 | 11.6 ± 1.7 | 1.26 ± 0.17 | -32.4 ± 3.7            | -74.3 ± 12.9                           | 21.8 ± 0.4             | -10.7 ± 0.1            | -0.3                   |
| C30U <sup>d</sup>                                            | 810 ± 120  | 0.90 ± 0.01 | -27.0 ± 0.2            | -64.2 ± 1.0                            | 18.8 ± 0.3             | -8.2 ± 0.1             | 2.2                    |
| U41C <sup>d</sup>                                            | 1600 ± 20  | 0.83 ± 0.01 | -20.5 ± 0.6            | -43.3 ± 1.8                            | 12.7 ± 0.5             | -7.8 ± 0.1             | 2.6                    |
| wild type,<br>in-line<br>probing<br>condition <sup>e,f</sup> | 72.9 ± 0.9 | 0.85 ± 0.01 | -38.2 ± 1.0            | -94.6 ± 4.9                            | 28.1 ± 0.9             | -10.5 ± 0.4            | -0.1                   |
| wild type,<br>0.5 mM<br>EDTA                                 | 72.5 ± 6.3 | 0.57 ± 0.05 | -68.6 ± 0.5            | -201 ± 1.4                             | 58.9 ± 0.4             | -9.7 ± 0.1             | 0.7                    |
| wild type,<br>1 mM cobalt<br>hexammine                       | 35.6 ± 0.1 | 1.06 ± 0.02 | -27.2 ± 0.3            | -58.7 ± 0.9                            | 17.2 ± 0.3             | -10.0 ± 0.1            | 0.4                    |
| MC <sup>c</sup><br>20 mM<br>MgCl <sub>2</sub>                | 10.2 ± 2.6 | 1.17 ± 0.03 | -33.7 ± 1.2            | -78.5 ± 4.2                            | 23.0 ± 0.1             | -10.7 ± 0.2            | -0.3                   |

<sup>a</sup> Thermodynamic parameters are the results mean and standard deviation of two or more independent experiments.

<sup>b</sup>  $\Delta\Delta G$  is calculated relative to wild type.

<sup>c</sup> MC is the modified construct (**Supplementary Fig. 1a**) used in crystallization and some ITC analyses.

<sup>d</sup> Mutants were introduced in the context of the wild type sequence (**Fig. 1b**).

<sup>e</sup> In-line probing conditions here were intended to match those used for in-line probing experiments (**Supplementary Fig. 9**). ITC was carried out at 25 °C, with 0.020 M MgCl<sub>2</sub>, 0.10 M KCl, and 0.050 M HEPES pH 8.3.

<sup>f</sup> The results indicate a 4-fold loss in preQ<sub>1</sub> affinity when the wild type preQ<sub>1</sub>-II riboswitch 77-mer (**Fig. 1b**) is analyzed under in-line probing conditions (i.e.  $K_{rel}$  of 72.9 / 17.9); the change of MgCl<sub>2</sub> from 6 mM to 20 mM had no tangible effect on preQ<sub>1</sub> binding for MC (**Supplementary Table 1**). The remaining ~4-fold difference in the ITC  $K_D$  for preQ<sub>1</sub> affinity compared to that obtained from in-line probing (**Supplementary Fig. 9b**; i.e.  $K_{rel}$  of ~300 / 72.9) is likely to be the result of differences in the respective constructs (i.e. the 77-mer in **Fig. 1b** versus the extended in-line probing construct in **Supplementary Fig 1b**). This difference is consistent with prior work in which 3.5-fold difference was observed between  $K_D$  values measured for the same riboswitch but with different expression platform lengths (summarized in ref. 1).

**Supplementary Table 2 | PreQ<sub>1</sub>-II riboswitch X-ray diffraction and refinement statistics**

|                                                         | SAD Phasing                          | High Resolution                      |
|---------------------------------------------------------|--------------------------------------|--------------------------------------|
| <b>Data collection</b>                                  |                                      |                                      |
| Space group                                             | <i>C</i> 222 <sub>1</sub>            | <i>C</i> 222 <sub>1</sub>            |
| Cell dimensions                                         |                                      |                                      |
| <i>a, b, c</i> (Å)                                      | 58.1, 86.7, 98.1                     | 58.0, 85.9, 98.1                     |
| $\alpha, \beta, \gamma$ (°)                             | $\alpha = \beta = \gamma = 90^\circ$ | $\alpha = \beta = \gamma = 90^\circ$ |
| Resolution (Å)                                          | 50.0 – 2.6 (2.7 – 2.6) *             | 25.7 – 2.3 (2.4 – 2.3) *             |
| <i>R</i> <sub>sym</sub> (%)                             | 8.0 (40.0)                           | 5.3 (23.7)                           |
| <i>I</i> / $\sigma I$                                   | 35.2 (9.6)                           | 14.1 (3.0)                           |
| Completeness (%)                                        | 99.0 (95.8)                          | 97.8 (85.5)                          |
| Redundancy                                              | 18.1 (18.2)                          | 4.2 (3.8)                            |
| <b>Refinement</b>                                       |                                      |                                      |
| Resolution (Å)                                          | 50.0 – 2.6                           | 25.7 – 2.3                           |
| No. reflections                                         | 261,080                              | 47,509                               |
| <i>R</i> <sub>work</sub> / <i>R</i> <sub>free</sub> (%) | 19.4 / 25.1                          | 19.3 / 24.4                          |
| No. atoms                                               |                                      |                                      |
| RNA                                                     | 1571                                 | 1612                                 |
| Ligand                                                  | 13                                   | 13                                   |
| Cs <sup>+</sup>                                         | 15                                   | 15                                   |
| Mg <sup>2+</sup>                                        | 5                                    | 4                                    |
| Water                                                   | 39                                   | 152                                  |
| <i>B</i> -factors (Å <sup>2</sup> )                     |                                      |                                      |
| RNA                                                     | 35                                   | 31                                   |
| Ligand/ions                                             | 35                                   | 30                                   |
| Water                                                   | 31                                   | 28                                   |
| R.m.s. deviations                                       |                                      |                                      |
| Bond lengths (Å)                                        | 0.010                                | 0.008                                |
| Bond angles (°)                                         | 1.69                                 | 1.33                                 |

\*Values in parentheses represent those for the highest-resolution shell.

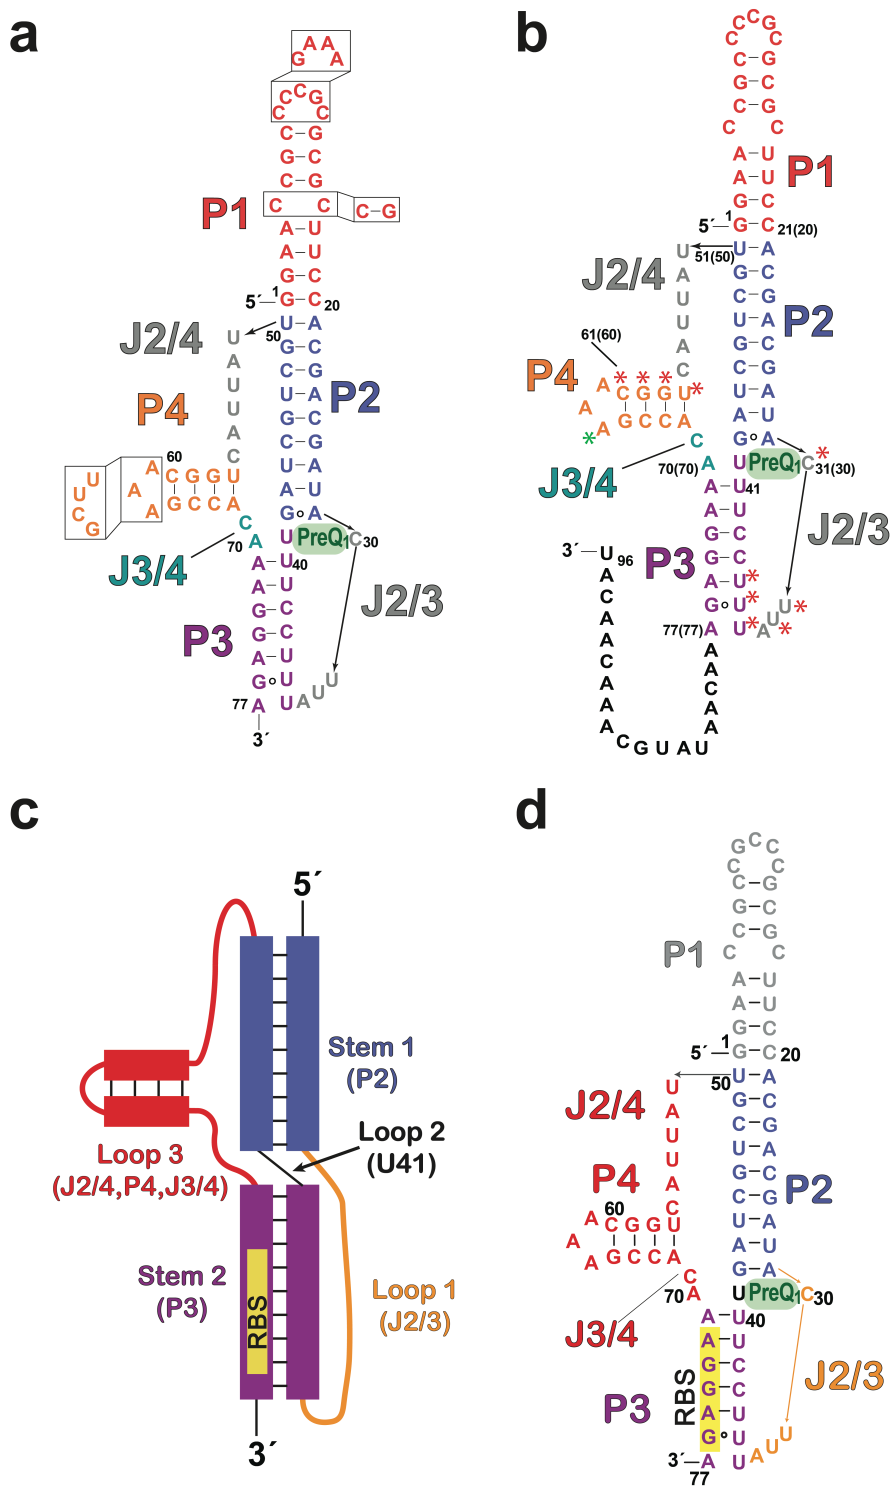

**Supplementary Figure 1 | *Lactobacillus rhamnosus* preQ<sub>1</sub>-II sequences used in this investigation, and pseudoknot classification.** (a) Changes to wild type (77-mer) sequence that produced the modified construct (MC) for crystallization or ITC are indicated by inset boxes. Areas targeted for changes exhibited low sequence conservation, or dispensability in preQ<sub>1</sub>

binding<sup>2</sup>. **(b)** The extended wild type (96-mer) sequence used herein for in-line probing. The AUG start codon at the 3'-end was included in addition to the ensuing three codons. The primary numbering is based on the actual wild type sequence; parenthetical values are those from the MC used in crystallization and ITC (i.e. panel **a**); the MC numbering has been adopted throughout the document. Positions analyzed by in-line probing analysis (**Supplementary Fig. 9b**) are marked by asterisks, where red indicates decreased cleavage and green represents increased cleavage as a function of increased preQ<sub>1</sub> concentration; see **Supplemental Fig. 9** for experimental results. **(c)** Schematic diagram of an H-type pseudoknot in relation to the preQ<sub>1</sub>-II riboswitch of this investigation. In the classical definition, stem 1 (equivalent to P2) is followed by loop 1 (equivalent to J2/3), which pairs with loop 3 (J2/4, P4, and J3/4) to form a second helix called stem 2 (P3) (as reviewed in 3). A main difference in topology between the canonical H-type pseudoknot and that of the preQ<sub>1</sub>-II riboswitch is the extra stem (P4) in the latter. **(d)** Secondary structure of the wild type *L. rhamnosus* preQ<sub>1</sub>-II riboswitch with bases colored to match the H-type pseudoknot diagram in panel **c**.

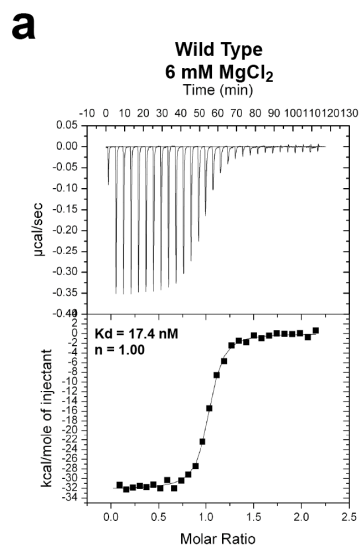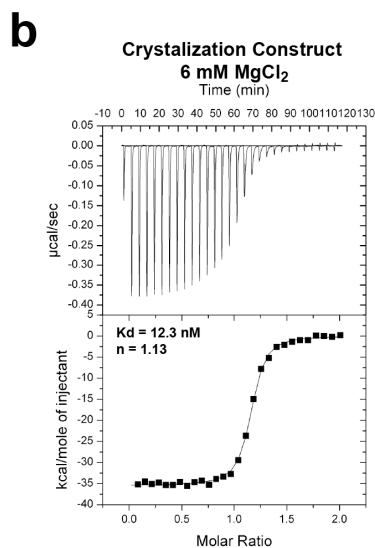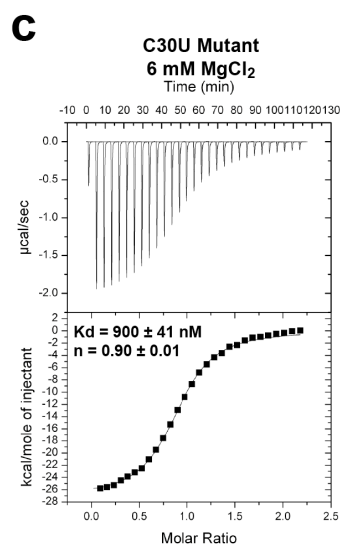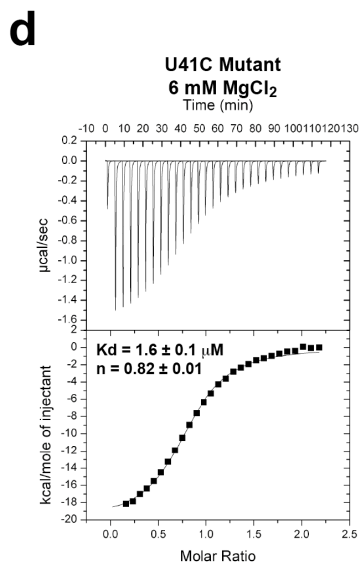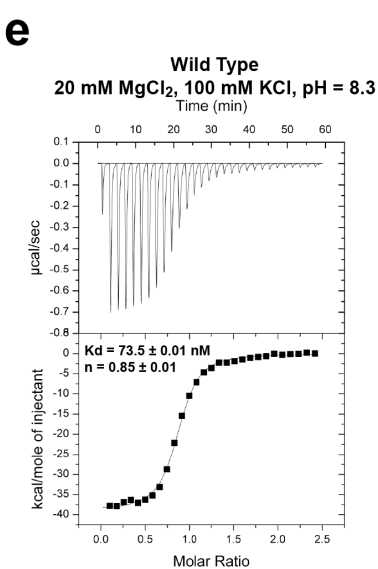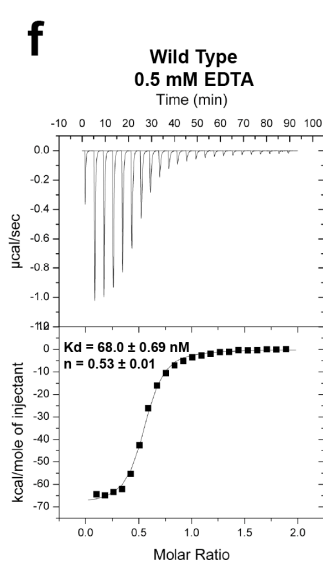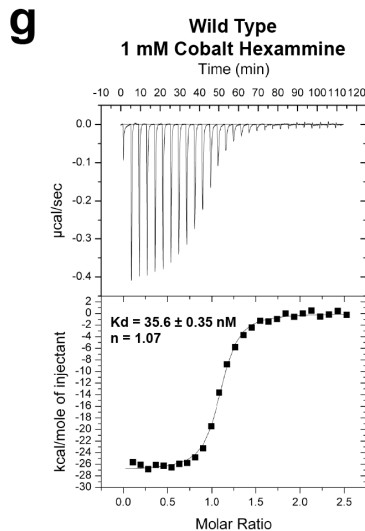

**Supplementary Figure 2 | Representative isothermal titration calorimetry (ITC) experiments for preQ<sub>1</sub> binding to the *L. rhamnosus* preQ<sub>1</sub>-II riboswitch.** Apparent K<sub>D</sub> and stoichiometry values (n) for individual experiments are shown; average values are provided in **Supplementary Table 1**. **(a)** PreQ<sub>1</sub> binding to the wild type preQ<sub>1</sub>-II riboswitch (**Fig. 1b** of the main text) in 0.10 M NaCl, 0.006 M MgCl<sub>2</sub>, and 0.050 M HEPES pH 7.0 **(b)** PreQ<sub>1</sub> binding to the MC (**Supplementary Fig. 1a**) under conditions identical to those in **a**. **(c)** PreQ<sub>1</sub> binding to the C30U mutant in the context of the wild type *L. rhamnosus* riboswitch sequence under conditions identical to those in **a**. **(d)** PreQ<sub>1</sub> binding to the U41C mutant *L. rhamnosus* riboswitch in the context of the wild type *L. rhamnosus* riboswitch sequence under conditions identical to those in panel **a**. **(e)** PreQ<sub>1</sub> binding at 25 °C to the wild type riboswitch in 0.10 M KCl, 0.020 M MgCl<sub>2</sub>, and 0.050 M HEPPS pH 8.3. These conditions are similar to those used for in-line probing (**Supplementary Fig. 9**). **(f)** PreQ<sub>1</sub> binding to the wild type riboswitch in 0.10 M NaCl, 0.5 mM EDTA, and 0.050 M HEPES pH 7.0. **(g)** PreQ<sub>1</sub> binding to the wild type riboswitch in 0.10 M NaCl, 0.001 M hexammine cobalt(III) chloride, and 0.050 M HEPES pH 7.0.



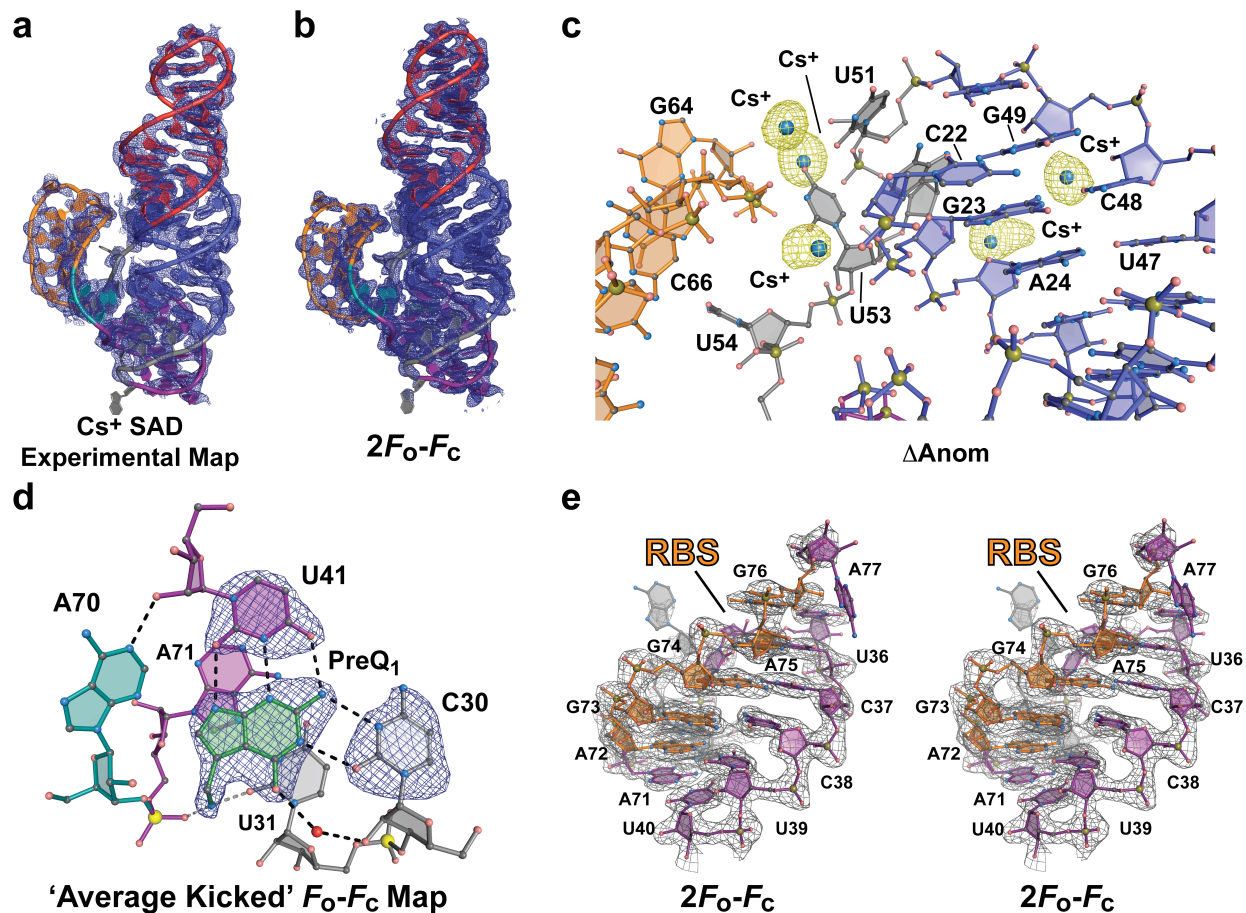

**Supplementary Figure 3 | Representative electron-density maps of the preQ<sub>1</sub>-II riboswitch in the ligand-bound state.** (a) The 2.6 Å resolution experimental electron density map at the 1.0  $\sigma$  level was generated by use of the initial density-modified, Cs<sup>+</sup>-SAD phases; a cartoon from the final refined coordinates is included as in **Fig. 1c**. (b) Final 2.3 Å resolution  $2F_o - F_c$  electron density at the 1.0  $\sigma$  level calculated using phases from the final refined model. Bases 33, 34, and 35 of J2/4, as well as 76 and 77 exhibited evidence of conformational disorder but were capable of being modeled; for details see **Supplementary Figure 5a-c**. (c) Representative site-bound Cs<sup>+</sup> ions used for SAD phasing and included in the final refined coordinates; the accompanying anomalous difference Fourier map at 2.6 Å resolution was contoured at the 3.0  $\sigma$  level. (d) Close up view of the preQ<sub>1</sub> binding site. The final refined structure is shown within a  $\sigma_a$ -weighted  $F_o - F_c$  averaged kicked electron density map at 2.3 Å resolution calculated with the nucleobases C30 and U41 as well as preQ<sub>1</sub> omitted from the phase calculation; the contour level is 3.0  $\sigma$ . (e) Close-up stereo view of the ribosome binding site (RBS) (shown in orange) fit into  $\sigma_a$ -weighted  $2F_o - F_c$  electron-density map at 2.3 Å resolution and contoured at the 1.0  $\sigma$  level. The map was calculated using phases from the final refined model.

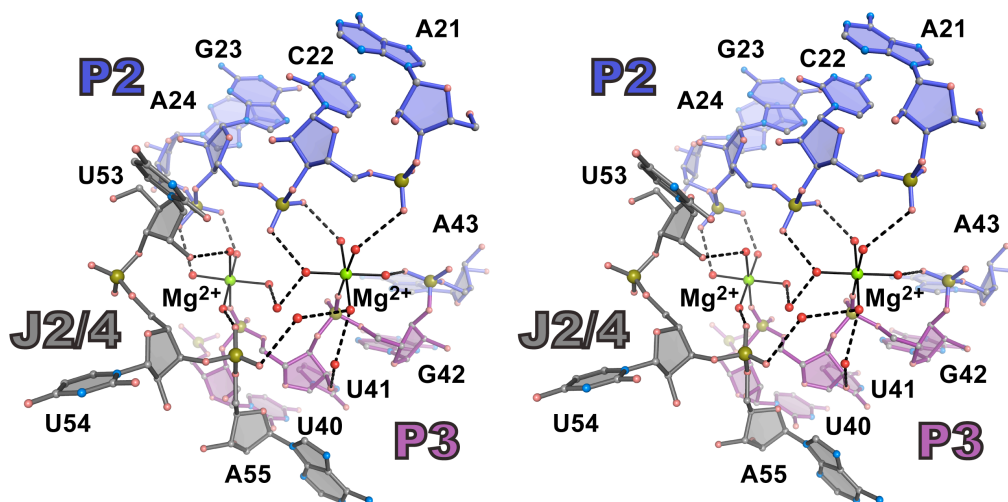

**Supplementary Figure 4 | Long-range interactions mediated by site-bound  $Mg^{2+}$  ions in the preQ<sub>1</sub>-II riboswitch.** Stereo diagram of the two most prominent  $Mg^{2+}$  ions in the structure (depicted in the global view in **Fig. 1c**). One mode of tertiary structure stabilization involves inner and outer sphere contact to RNA and water ligands, which utilizes  $Mg^{2+}$  ions with octahedral geometry (as depicted above). ITC experiments performed in the absence of  $Mg^{2+}$  (**Supplementary Figure 2f** and **Supplementary Table 1**) demonstrate that the preQ<sub>1</sub>-II riboswitch can bind ligand in the absence of  $Mg^{2+}$ , but is destabilized as indicated by a greater change in entropy upon ligand binding; this observation is similar to  $Mg^{2+}$ -free ligand binding by the SAH riboswitch<sup>4</sup>. Moreover, our *n* value from ITC was ~0.6, indicating a significant fraction of the riboswitch is incompetent to bind ligand in the absence of  $Mg^{2+}$ . Furthermore, we observed a modest 2-fold change in ligand binding when  $MgCl_2$  is substituted with hexamine cobalt(III) chloride (**Supplementary Figure 2g** and **Supplementary Table 1**), suggesting that multivalent ions can stabilize the riboswitch fold by strictly outer-sphere metal ion contacts.

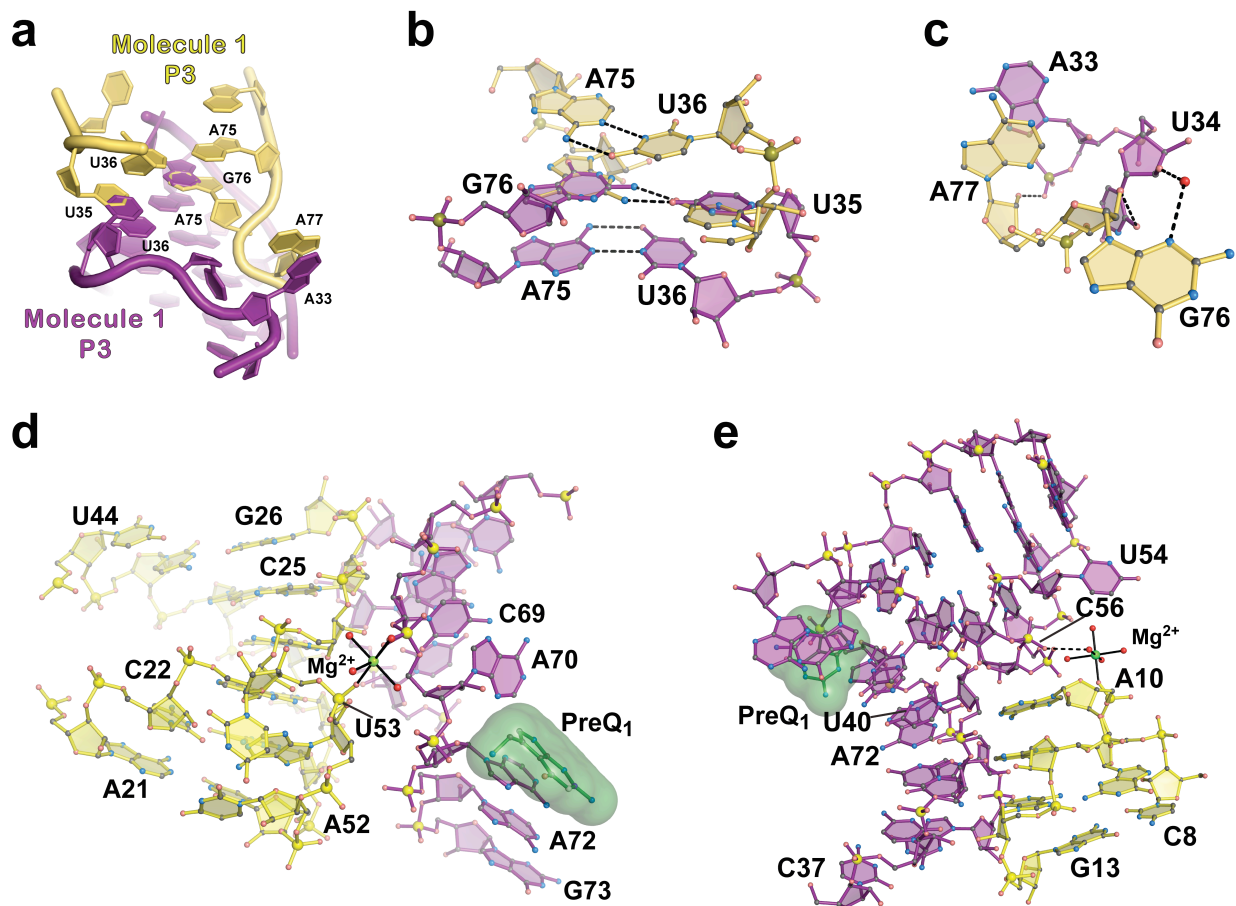

**Supplementary Figure 5 | Symmetry-related intermolecular interactions for the preQ<sub>1</sub>-II riboswitch in the crystal lattice.** (a) Cartoon showing the 3'-end base stack interaction between P3 of "molecule 1" (purple) and a symmetry related "molecule 1" (yellow). (b) Closeup view of the 3'-end from a emphasizing the conformational disorder of bases U35 and G76. Here a hydrogen bond forms between N4 of U35 of molecule 1 and N2 of G76 of symmetry-related molecule 2, which is related by a proper dyad axis. Due to the conformational disorder of these bases, each was modeled with 50% occupancy to account for the spatial overlap from symmetry related bases; the remaining 50% occupancy of these positions was assumed to be disordered. (c) Close-up of interactions between A77 and G76 of molecule 1, and A33 and U34 of molecule 2 illustrating the chemical sensibility of the long-range interaction, and the unstacking of base A77 from the preceding RBS. (d) Close-up view of the preQ<sub>1</sub>-binding site in which Mg<sup>2+</sup> (green sphere) mediates inner-sphere contacts between symmetry-related molecules. Significantly, there are no crystal contacts in the immediate vicinity of the ligand. (e) Close-up views of two crystal-contact points mediated by inner sphere Mg<sup>2+</sup> coordination involving intermolecularly related phosphate backbones. The ligand-binding site is shown to emphasize the absence of proximal crystal contacts.

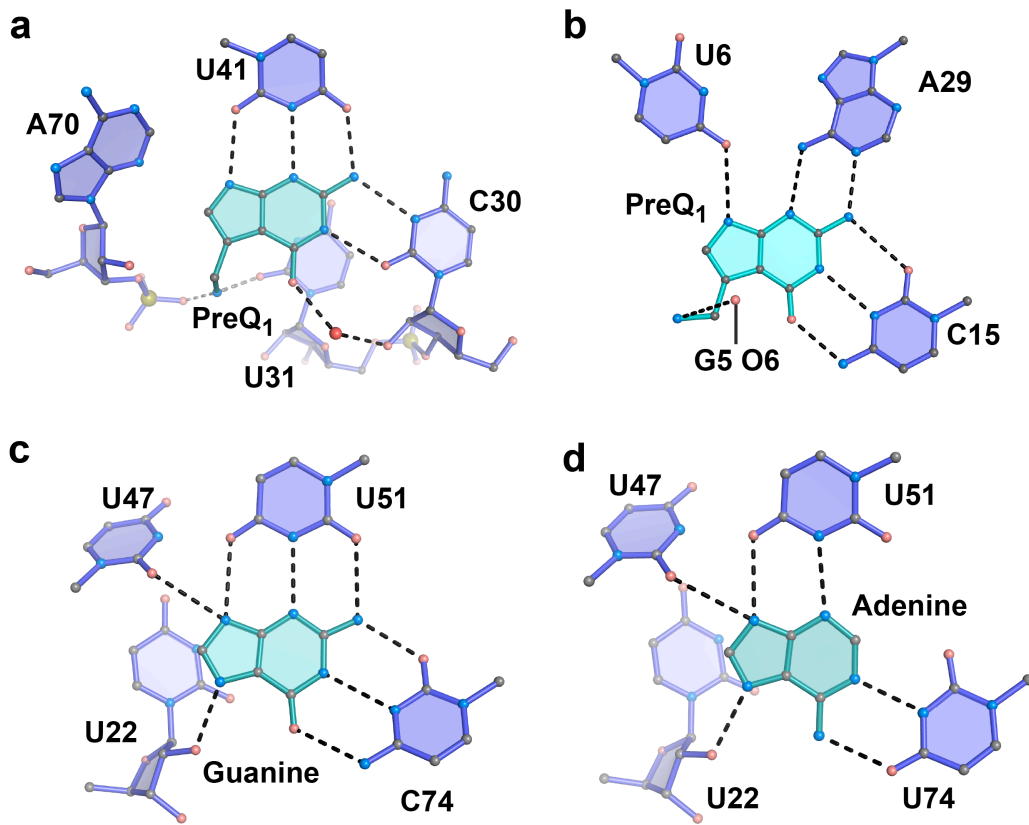

**Supplementary Figure 6 | Comparison of ligand recognition by the preQ<sub>1</sub>-II riboswitch to known riboswitch structures that sense purine-like nucleobase effectors.** (a) The preQ<sub>1</sub>-II riboswitch of this investigation in complex with preQ<sub>1</sub>. (b) The preQ<sub>1</sub>-I translational riboswitch in complex with preQ<sub>1</sub> (PDB ID 3Q50)<sup>5</sup>. (c) The guanine riboswitch bound to guanine (PDB ID 1Y27)<sup>6</sup>. (d) The adenine riboswitch bound to adenine (PDB ID 1Y26)<sup>6</sup>.

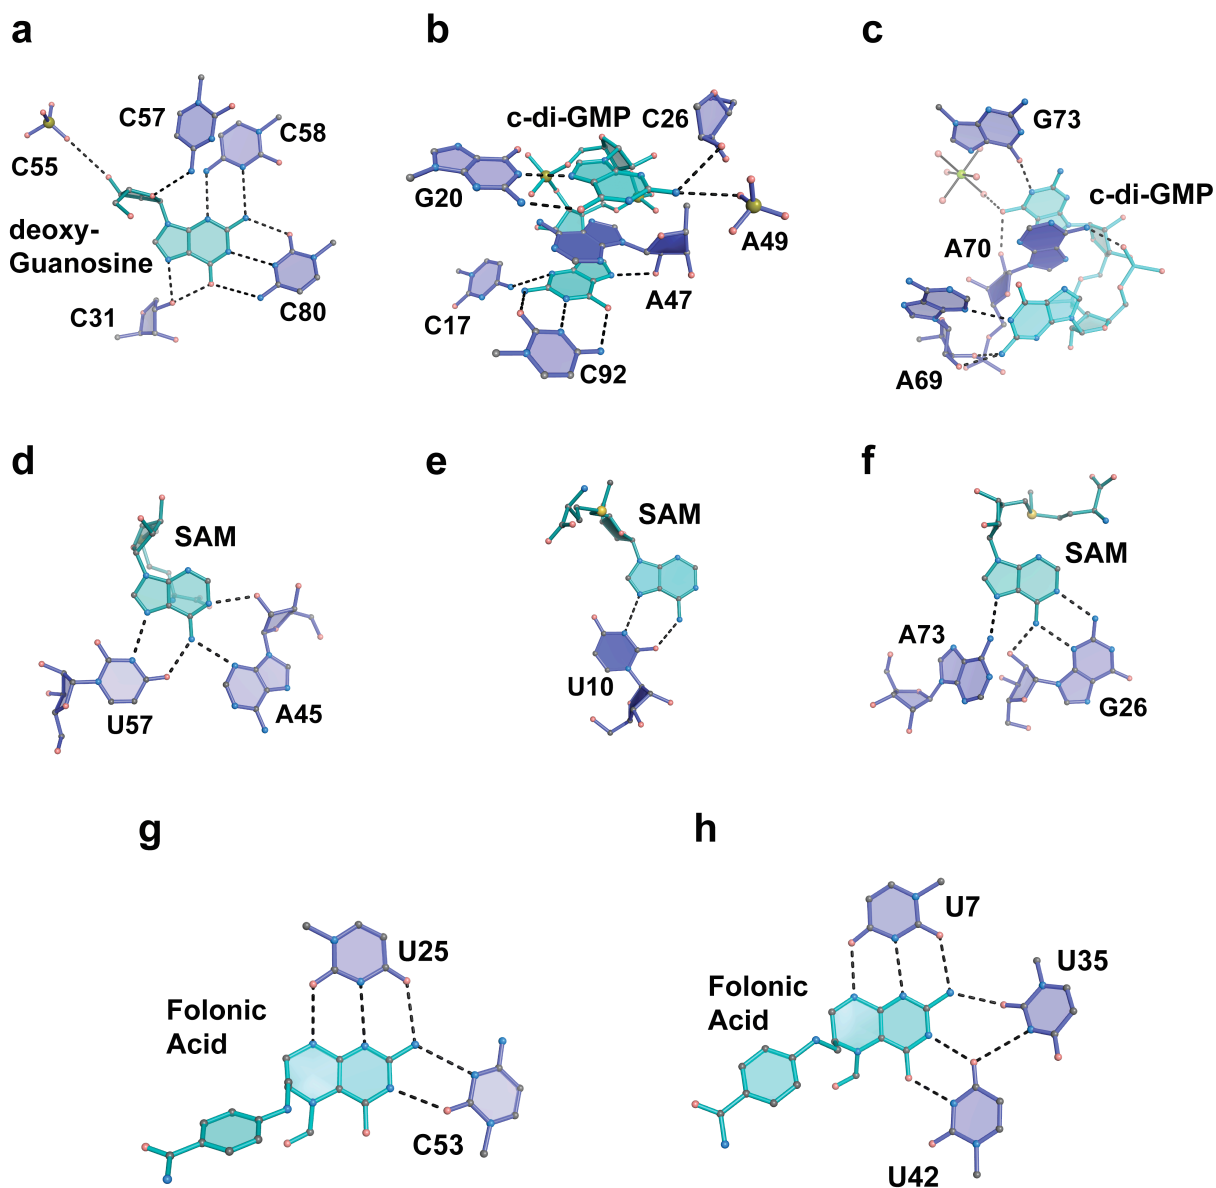

**Supplementary Figure 7 | The mode of ligand-recognition by riboswitches that sense effectors containing a purine or purine-like moiety using canonical and non-Watson-Crick pairing.** (a) The 2'-deoxyguanosine riboswitch bound to its ligand (PDB ID 3SKI)<sup>7</sup>. (b) The class I cyclic-di-GMP riboswitch bound to the second messenger cyclic-di-GMP (PDB ID 3MXH)<sup>8</sup>. (c) The class II cyclic-di-GMP riboswitch bound to cyclic-di-GMP (PDB ID 3Q3Z)<sup>9</sup>. (d) The SAM-I riboswitch in bound to S-adenosyl methioine (SAM) (PDB ID 2GIS)<sup>10</sup>. (e) The SAM-II riboswitch bound to SAM (PDB ID 2QWY)<sup>11</sup>. (f) The SAM-III riboswitch bound to SAM (PDB ID 3E5C)<sup>12</sup>. (g) The tetrahydrofolate (THF) riboswitch in complex with folinic acid at the three-way-helical junction binding site (PDB ID 3SD1)<sup>13</sup> appears comparable to the mode of preQ<sub>1</sub>-II-based readout of preQ<sub>1</sub>, as described in **Fig. 2a** and **Supplementary Fig. 6a**. (h) The THF riboswitch in complex with folinic acid at the pseudoknot binding site (PDB ID 3SD1)<sup>13</sup>. Despite the presence of a trans-Watson-Crick/Watson-Crick pair, the mode of effector recognition by U42 and U35 is relatively dissimilar to interactions employed by C30 of the preQ<sub>1</sub>-II riboswitch.

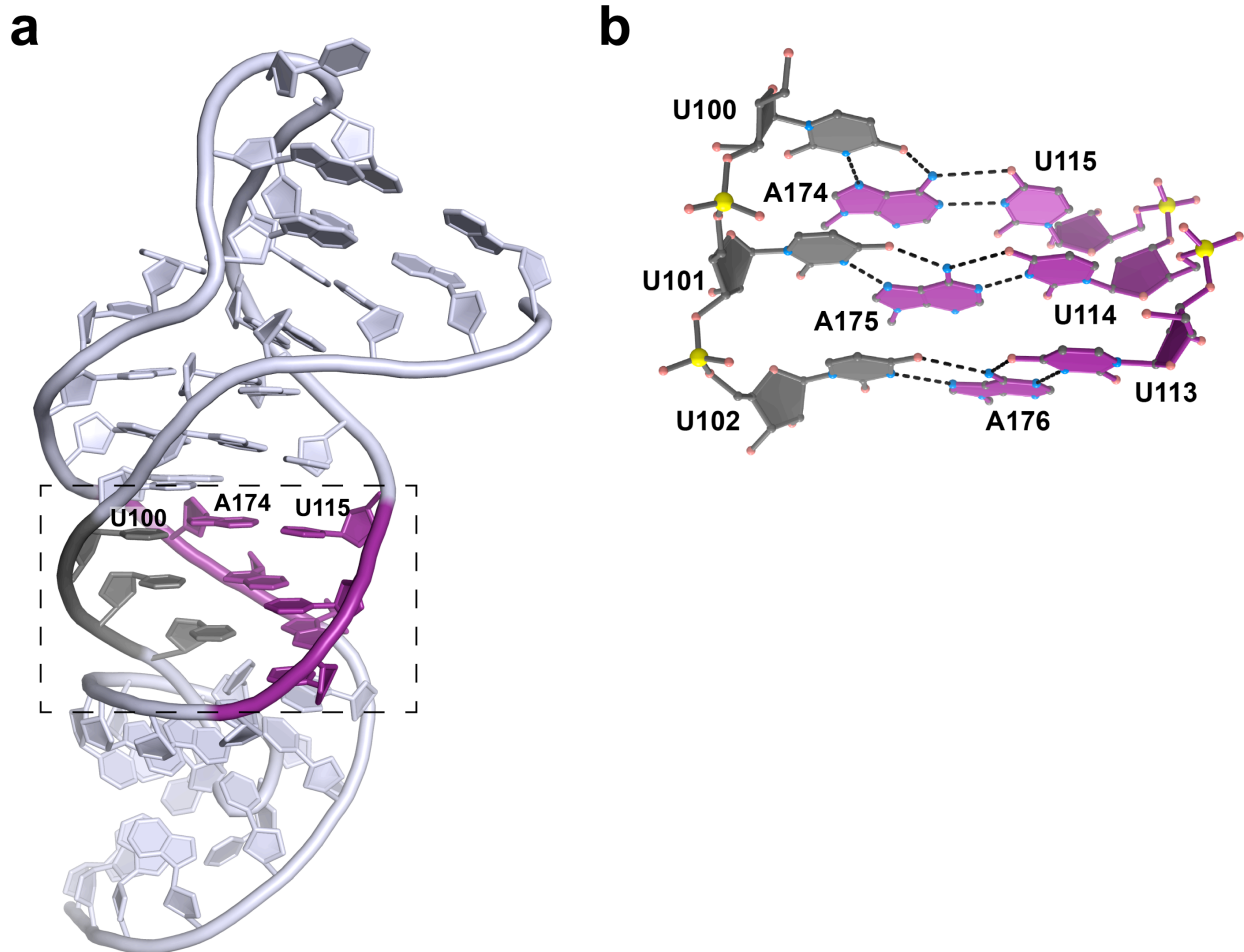

**Supplementary Figure 8 | The human telomerase RNA (hTR) pseudoknot structure (PDB ID 1YMO)<sup>14</sup>.** (a) Ribbon diagram of the hTR structure depicting the H-type pseudoknot. The bases that compose the hTR major-groove base triples are colored using the same scheme as those that form the major-groove base triples flanking the pseudoknot in the preQ<sub>1</sub>-II riboswitch (**Fig. 2d**). (b) Expanded view of the base triples from hTR including: U100•A174-U115, U101•A175-U114, and U102•A176-U113; these position are spatially comparable to: C30•PreQ<sub>1</sub>•U41, U31•A71-U40, and U32•A72-U39, respectively, shown in **Fig. 2e**.

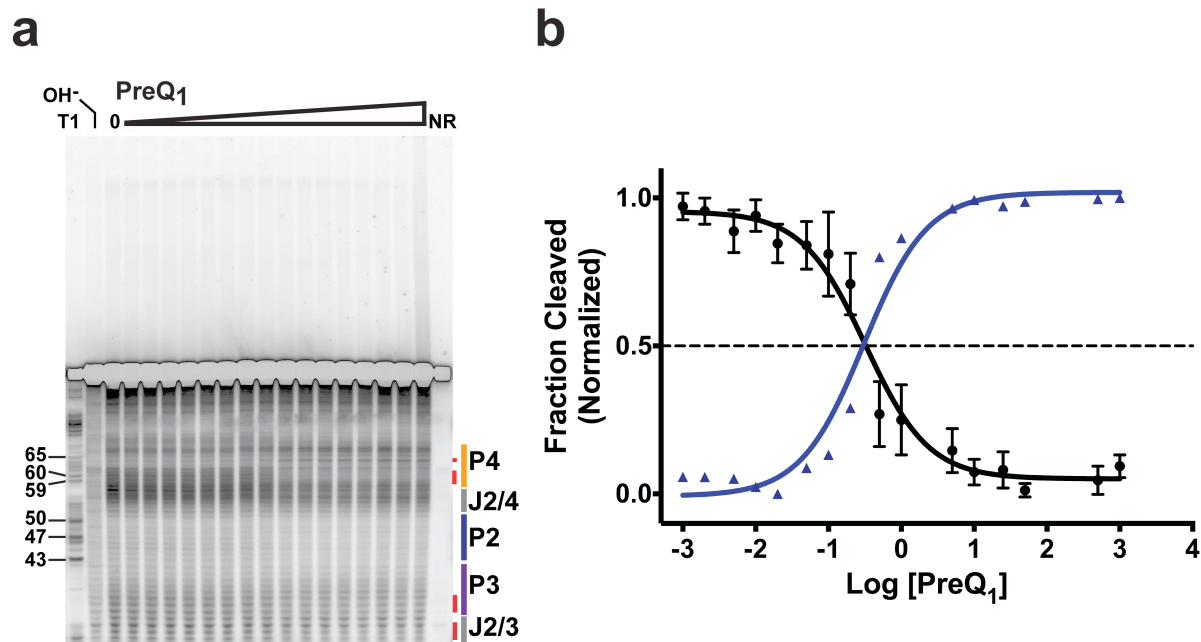

**Supplementary Figure 9 | Representative in-line probing gel of the wild type *L. rhamnosus* preQ<sub>1</sub>-II riboswitch.** (a) Denaturing polyacrylamide gel depicting in-line probing results conducted on the wild type preQ<sub>1</sub>-II riboswitch sequence (**Supplementary Fig. 1b**). From left to right, the preQ<sub>1</sub>-II riboswitch was incubated in the presence of increasing preQ<sub>1</sub> at the following concentrations: none, 1 nM, 2 nM, 5 nM, 10 nM, 20 nM, 50 nM, 100 nM, 200 nM, 500 nM, 1 μM, 5 μM, 10 μM, 25 μM, 50 μM, 500 μM, and 1000 μM. Nucleotide positions from the T1 digest are labeled on the left side. The alkaline ladder is indicated by OH<sup>-</sup>. Regions used in the analysis in **b** are shown by vertical red bars; secondary structure elements are color coded as in **Supplementary Fig. 1b**; and NR indicates no reaction. (b) Plot of the mean fraction cleaved and standard deviation at each concentration of preQ<sub>1</sub> for bases: 30, 31, 32 of the major-groove base triples; 34, 35, 36 of the anti-RBS; and 57, 58, 59, and 60 of P4 versus log of preQ<sub>1</sub> concentration in μM (shown as black circles with a black curve). A separate curve was plotted for position 63 in the stem loop of P4 (shown as blue triangles with a blue line), which exhibits increased flexibility with increasing preQ<sub>1</sub>, as shown previously<sup>2</sup>. Both curves gave apparent K<sub>D</sub> values of 0.3 μM. Positions used in this analysis are marked by asterisks in **Supplementary Fig. 1b**. Numbering is based on the MC scheme in **Supplementary Fig. 1a**.

## References

- 1 Rieder, U., Kreutz, C. & Micura, R. Folding of a transcriptionally acting preQ<sub>1</sub> riboswitch. *Proc. Natl. Acad. Sci. USA* **107**, 10804-10809, (2010).
- 2 Meyer, M. M., Roth, A., Chervin, S. M., Garcia, G. A. & Breaker, R. R. Confirmation of a second natural preQ<sub>1</sub> aptamer class in Streptococcaceae bacteria. *RNA* **14**, 685-695, (2008).
- 3 Liu, B., Mathews, D. H. & Turner, D.H. RNA pseudoknots: folding and finding. *F1000 Reports Biol.* **2**, 8, (2010).
- 4 Edwards, A. L., Reyes, F. E., Heroux, A. & Batey, R. T. Structural basis for recognition of S-adenosylhomocysteine by riboswitches. *RNA* **16**, 2144-2155, (2010).
- 5 Jenkins, J. L., Krucinska, J., McCarty, R. M., Bandarian, V. & Wedekind, J. E. Comparison of a preQ<sub>1</sub> riboswitch aptamer in metabolite-bound and free states with implications for gene regulation. *J. Biol. Chem.* **286**, 24626-24637, (2011).
- 6 Serganov, A. *et al.* Structural basis for discriminative regulation of gene expression by adenine- and guanine-sensing mRNAs. *Chem. Biol.* **11**, 1729-1741, (2004).
- 7 Pikovskaya, O., Polonskaia, A., Patel, D. J. & Serganov, A. Structural principles of nucleoside selectivity in a 2'-deoxyguanosine riboswitch. *Nat. Chem. Biol.* **7**, 748-755, (2011).
- 8 Smith, K. D., Lipchock, S. V., Livingston, A. L., Shanahan, C. A. & Strobel, S. A. Structural and biochemical determinants of ligand binding by the c-di-GMP riboswitch. *Biochemistry* **49**, 7351-7359, (2010).
- 9 Smith, K. D., Shanahan, C. A., Moore, E. L., Simon, A. C. & Strobel, S. A. Structural basis of differential ligand recognition by two classes of bis-(3'-5')-cyclic dimeric guanosine monophosphate-binding riboswitches. *Proc. Natl. Acad. Sci. USA* **108**, 7757-7762, (2011).
- 10 Montange, R. K. & Batey, R. T. Structure of the S-adenosylmethionine riboswitch regulatory mRNA element. *Nature* **441**, 1172-1175, (2006).
- 11 Gilbert, S. D., Rambo, R. P., Van Tyne, D. & Batey, R. T. Structure of the SAM-II riboswitch bound to S-adenosylmethionine. *Nat. Struct. Mol. Biol.* **15**, 177-182, (2008).
- 12 Lu, C. *et al.* Crystal structures of the SAM-III/S(MK) riboswitch reveal the SAM-dependent translation inhibition mechanism. *Nat. Struct. Mol. Biol.* **15**, 1076-1083, (2008).
- 13 Trausch, J. J., Ceres, P., Reyes, F. E. & Batey, R. T. The structure of a tetrahydrofolate-sensing riboswitch reveals two ligand binding sites in a single aptamer. *Structure* **19**, 1413-1423, (2011).
- 14 Theimer, C. A., Blois, C. A. & Feigon, J. Structure of the human telomerase RNA pseudoknot reveals conserved tertiary interactions essential for function. *Mol. Cell* **17**, (2005).
